# Supplementary material for: Mechanotransduction events at the physiological site of touch detection
Source: eLife. 2023 Jan 6;12:e84179. doi: 10.7554/eLife.84179 (PMC9833821; doi:10.7554/eLife.84179)
Supplement: Figure 1—source data 1. [file elife-84179-fig1-data1.xlsx]

## Sheet: Source Data Figure 1
Figure 1F			Figure 1G			Figure 1H																Figure 1I
ON	OFF		ON	OFF		Indentation (μm)				ON								OFF				ON	OFF
17.9315			4.02996			1	-21.3929	-13.6781	-3.29983	-17.9165	-2.34079	-19.5312	-9.81842		-18.8051	-117.313	-29.7573	-6.0029	-15.0146	-10.6729		4
4.69828	3.9691		2.51657	2.42325		2	-33.33	-18.1924	-16.4807	-52.7182	-5.16587	-8.78906	-15.4461		-42.1182	-269.532	-76.3998	-24.9413	-19.5312	-10.197		5	9
13.1025	4.09452		1.53225	2.10115		3	-38.5919	-16.3053	-70.9794	-106.311	-3.90141	-26.8555	-44.6317		-77.9509	-440.852	-174.914	-45.8936	-32.1045	-23.5136		5	3
7.25616	2.67548		2.22083	1.35125		4	-63.2974	-8.35874	-183.916	-204.975	-9.22746	-34.668	-71.5728		-97.1039	-478.228	-300.434	-64.2812	-52.6123	-27.6275		4	1
6.78924	3.56786		1.35863	1.96011		5	-108.946	-16.4643	-238.912	-330.95	-22.2543	-74.8291	-90.1242		-100.815	-441.793	-425.31	-58.2651	-106.567	-54.8459		5	1
7.51859	4.54735		1.67105	1.77129		6	-161.034	-41.9586	-358.43	-455.062	-31.6479	-120.728	-111.188		-118.008	-412.629	-542.586	-52.644	-118.042	-97.516		6	6
5.35145	1.47937		1.17391	1.03767		7		-83.6314	-564.297	-569.786	-40.9124	-168.823	-110.257		-119.764	-426.968	-699.546	-65.0823	-151.611	-114.163
