# Supplementary material for: Mechanotransduction events at the physiological site of touch detection
Source: eLife. 2023 Jan 6;12:e84179. doi: 10.7554/eLife.84179 (PMC9833821; doi:10.7554/eLife.84179)
Supplement: Figure 2—source data 1. [file elife-84179-fig2-data1.xlsx]

## Sheet: Source Data Figure 2
Figure 2D													Figure 2E
Indentation (μm)			Control						1μM TTX				I, pA			Neurite						Lamellar Cell
1	-59.8694	-58.5785	-55.2612	-67.1753	-60.7544		-59.0922	-32.7332	-56.9153	-64.0625	-62.5061		10	0	0	0	0	0		0	0	0	0	0
2	-59.1431	-57.8857	-54.7241	-65.3137	-58.5693		-58.1726	-33.8501	-57.7759	-63.3484	-59.5703		20	0	0	0	0	0		0	0	0	1	0
3	-57.0984	-52.6672	-54.126	-60.437	-50.9338		-58.606	-34.6883	-55.4932	-61.4868	-52.3926		30	0	0	0	0	1		1	1	2	3	2
4	-50.0916	19.104	-47.8088	33.0994	15.4419		-52.0691	-33.5693	-52.5513	-58.197	-45.6238		40	0	0	0	0	1		1	1	4	4	4
5	6.82373	19.7327	15.8508	32.4768	17.1997		-48.5107	-28.8696	-49.4934	-53.9795	-36.5479		50	0	1	1	1	1		2	2	6	6	5
6	6.33545		15.625	31.9031	17.6514		-43.1458	-23.7793	-42.511	-50.8545	-31.1829		60	0	1	1	1	1		4	2	8	7	5
7			14.7888	30.8716	17.7612		-38.562	-19.2444	-37.8296	-48.6145	-20.3125		70	0	1	1	1	1		5	3	9	8	6
													80	1	1	1	1	1		7	5	10	9	5
													90	1	1	1	1	1		7	5	10	10	6
													100	1	1	1	1	1		8	8	10	10	6
Figure 2F			Figure 2G			Figure 2H			Figure 2I
Aff. terminal	Lamellar Cell		Aff. terminal	Lamellar Cell		Aff. terminal	Lamellar Cell				Aff. terminal							Lamellar Cell
-58.69	-72.94		52.6669	87.8963		3.1731	34.2833		Rise	34.3521	74.5122	134.512	100.488	71.0976			5.62347	4.03423	5	4.52323	7.70171
-60.58	-67.75		66.4509	77.9447		2.24555	36.3391		Decay (negative)	18.0488	27.439	56.846	36.9193	33.4963			5.74572	7.31707	7.33496	6.34146	8.90244
-58.65	-72.81		76.3265	78.4729		1.31533	84.777
-59.17	-62.74		73.6074	67.8167		1.79486	26.4044
-65.98	-70.89		73.1961	83.4389		2.17237	55.9372
